# Supplementary material for: Evaluation of protective efficacy of three novel H3N2 canine influenza vaccines
Source: PubMed Central journal article supplement (PMC5716715; doi:10.18632/oncotarget.21104), 2017-09-20
Supplement: oncotarget-08-98084-s001.pdf [file oncotarget-08-98084-s001.pdf]

# Evaluation of protective efficacy of three novel H3N2 canine influenza vaccines

## SUPPLEMENTARY MATERIALS

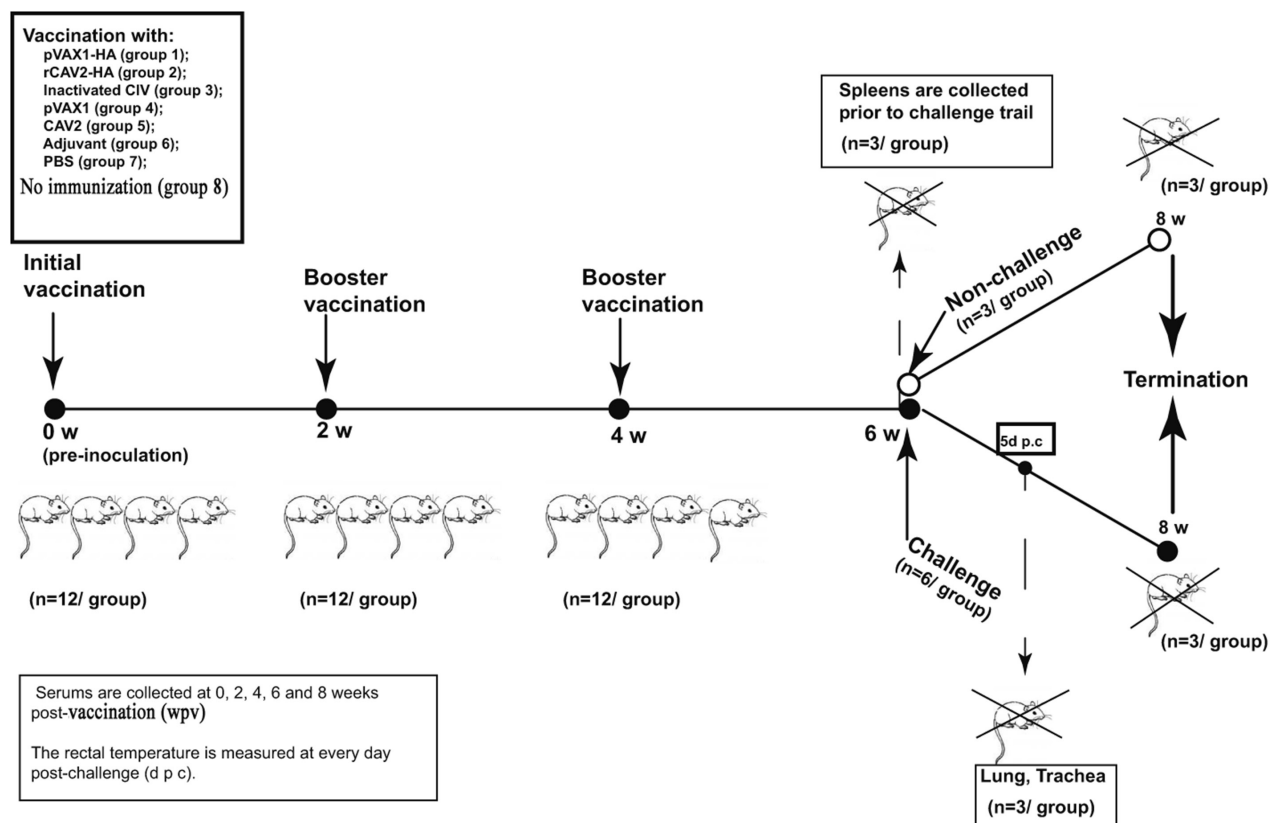

Supplementary Figure 1: Diagram of the experimental design.
